# Supplementary material
Source: MDPI journal article supplement (https://www.mdpi.com/1099-4300/19/1/12)
Supplement: s1 [file s1]

Archive with 4 entries (4 files):
- entropy-156177-supplementary.pdf
- Video_S1_complex.mp4
- Video_S2_periodic.mp4
- Video_S3_blinker.mp4
