# Supplementary material
Source: MDPI journal article supplement (https://www.mdpi.com/1099-4300/19/1/12)
Supplement: s1 [file s1 › entropy-156177-supplementary.pdf]

# Supplementary Materials: An Urban Cellular Automata Model for Simulating Dynamic States on a Local Scale

Jenni Partanen

## 1. Graphical Presentation of the Model Dynamics

In these tables, the time differences between the major shifts in the model (period, time steps on the  $y$ -axis) are ranked in chronological order (from the first to the  $n$ th ( $x$ -axis)) (This means that for each simulation, the number of iterations occurring between the volume maxims was calculated. (That is, the time steps required for the area to gradually fill. After that the progress started over again—see Videos S1–S3.) These values were then presented graphically in order from the first to the last. e.g., in B1, the area filled first after 10 time steps, then 12, 10, 12 and so on.).

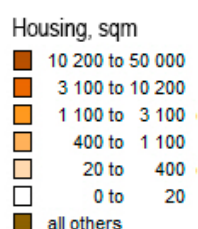

Figure S1. Legend for Video S1 and S3 (housing, volumes).

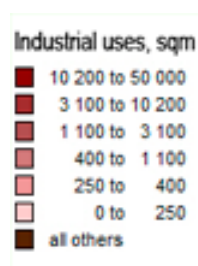

Figure S2. Legend for Video S2 (industrial uses, volumes).

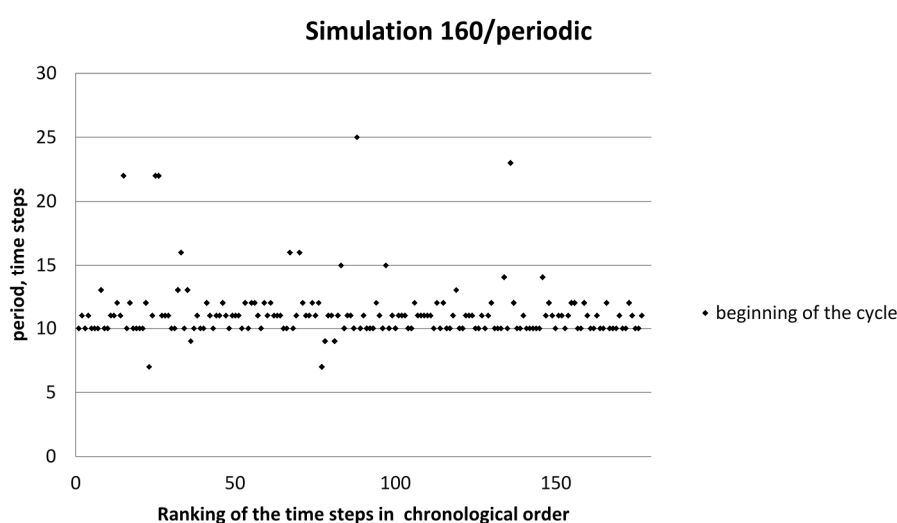

Figure S3. Periodic behavior.

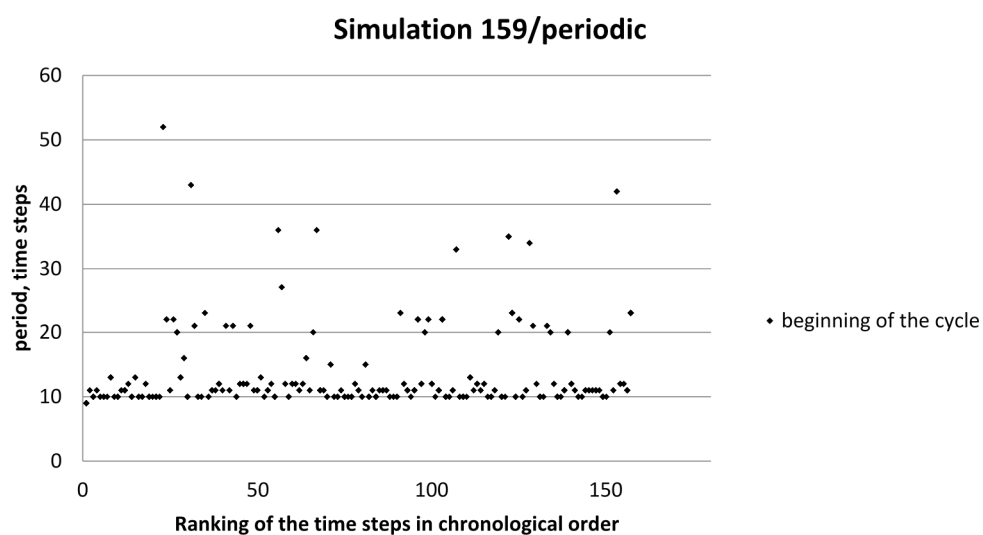

Figure S4. Periodic behavior.

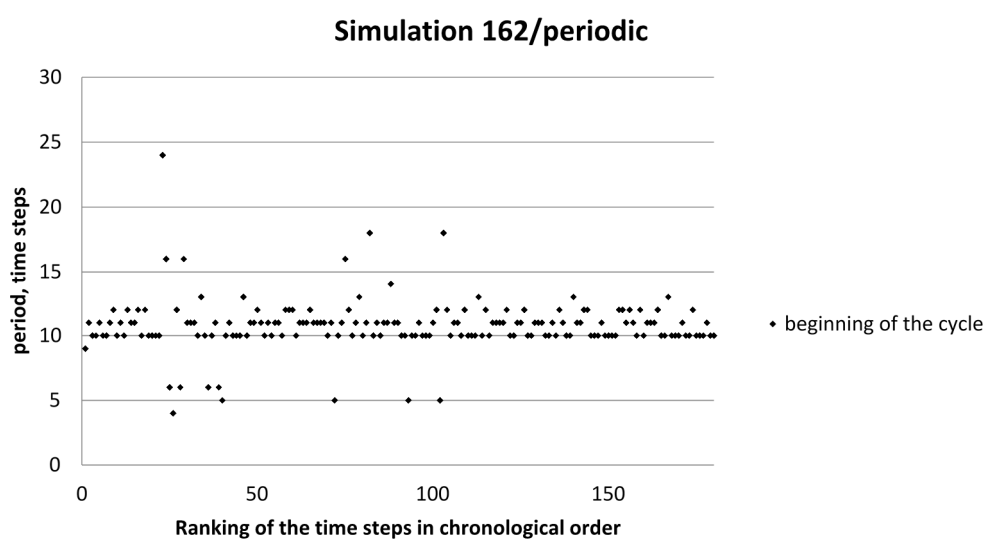

Figure S5. Periodic behavior.

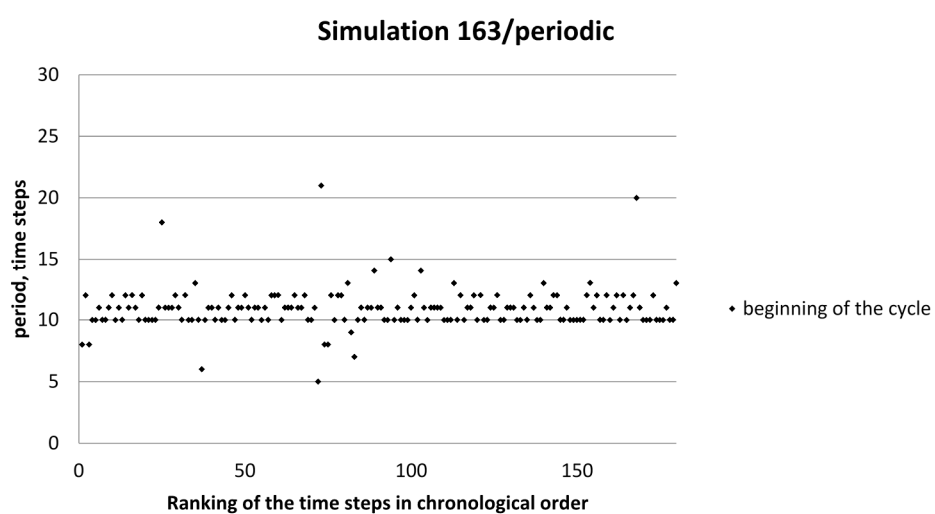

Figure S6. Periodic behavior.

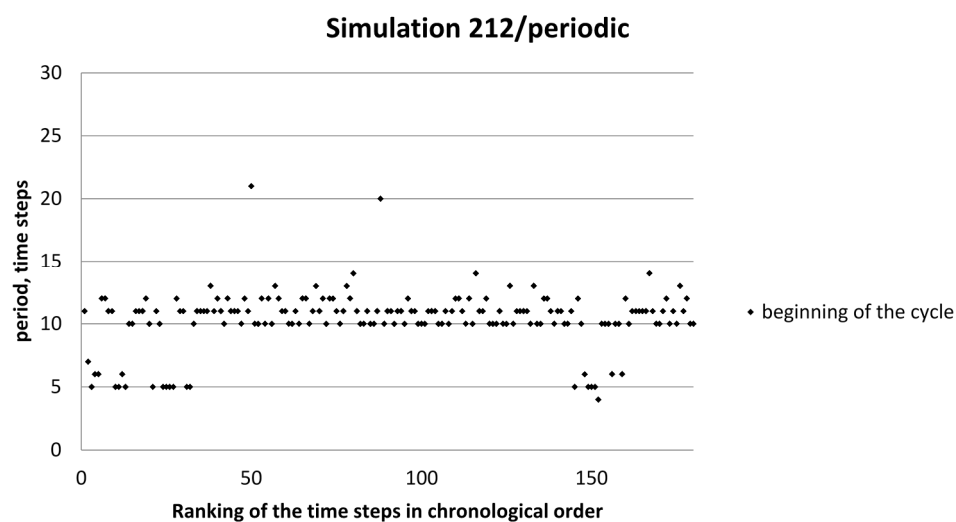

Figure S7. Periodic behavior.

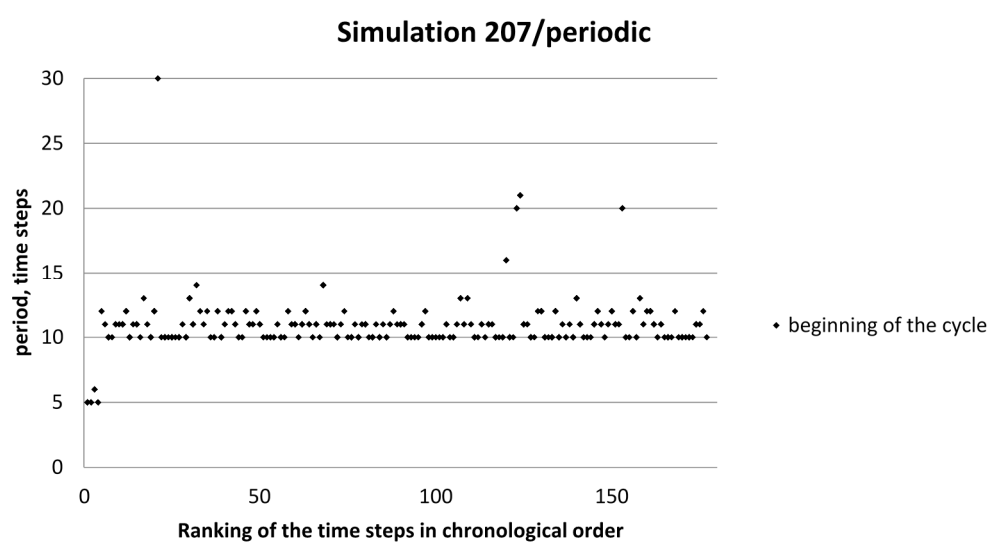

Figure S8. Periodic behavior.

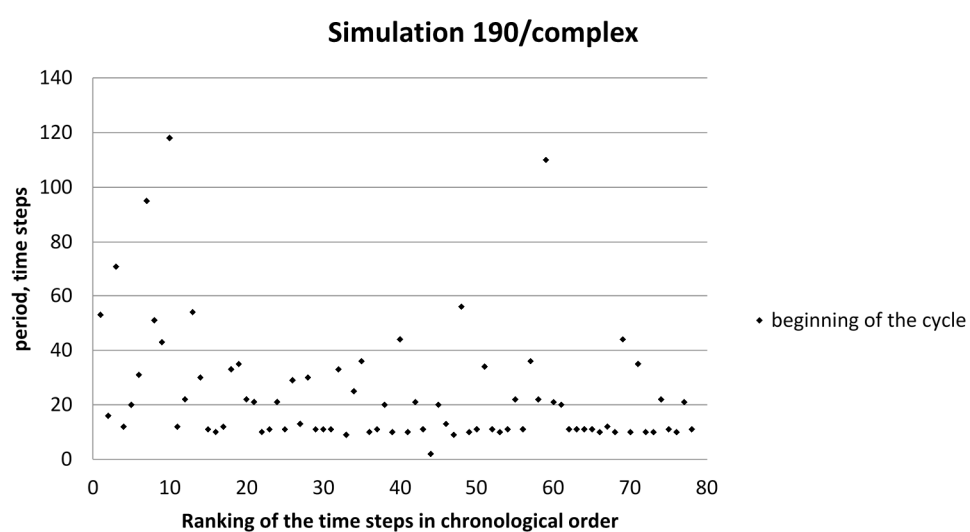

Figure S9. Complex behavior.

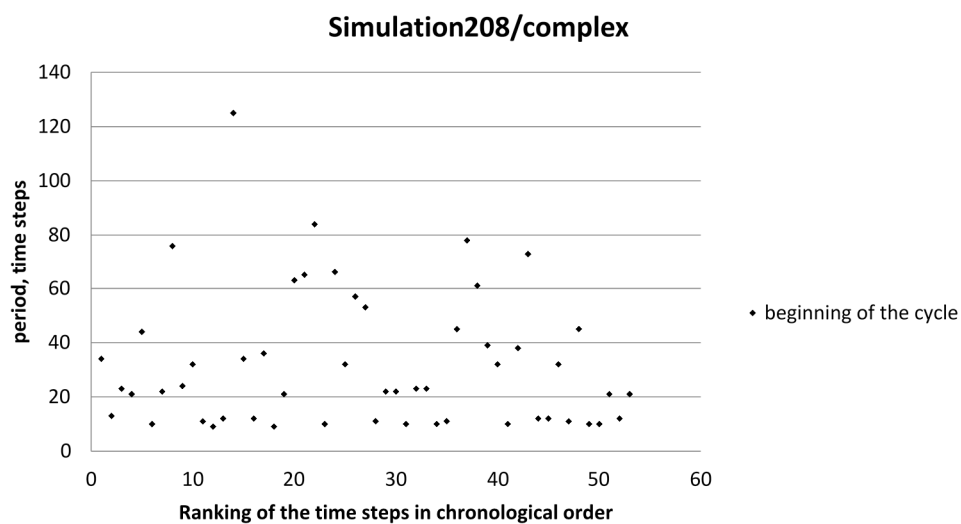

Figure S10. Complex behavior.

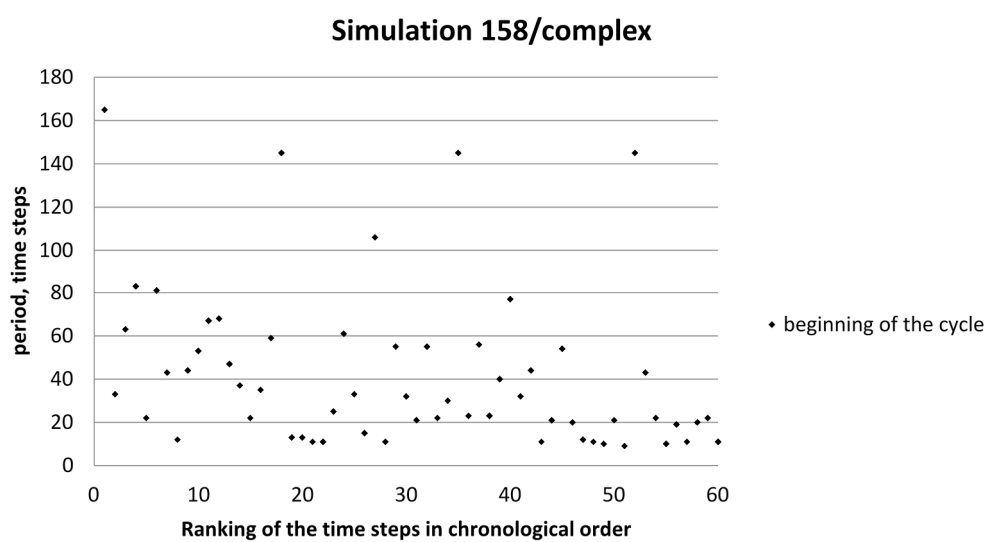

Figure S11. Complex behavior.

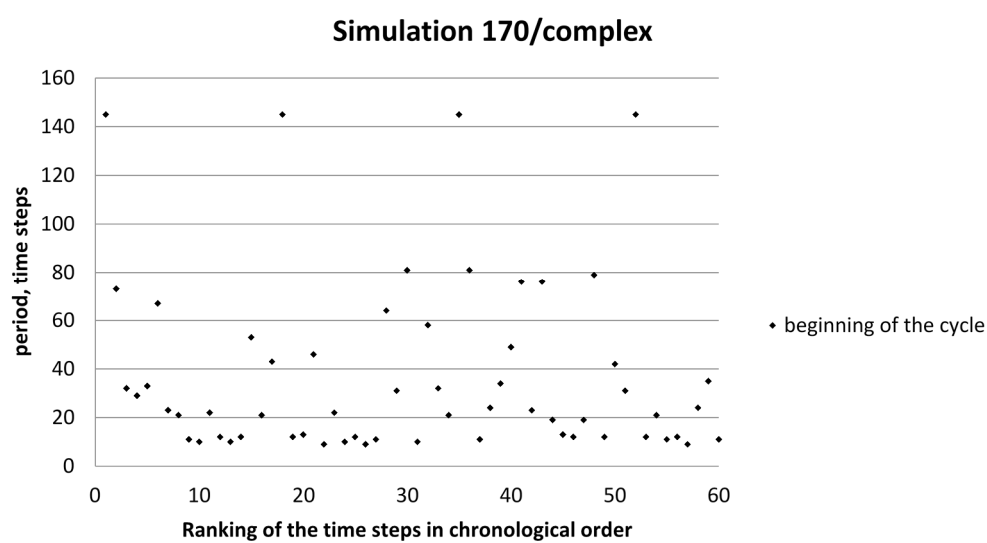

Figure S12. Complex behavior.

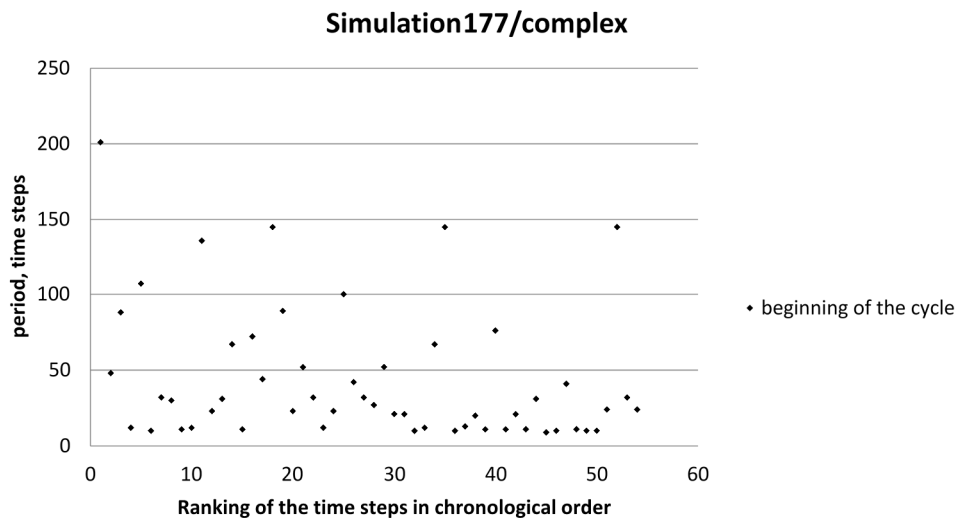

Figure S13. Complex behavior.

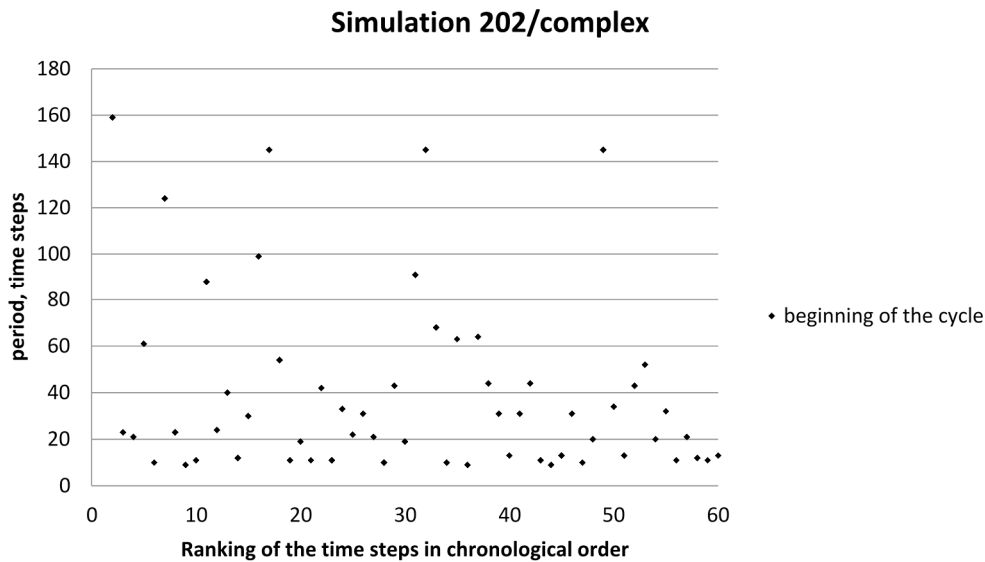

Figure S14. Complex behavior.
